# Supplementary material
Source: Springer Nature journal article supplement (https://www.springermedizin.de/resource/supplementary/12936_2005_124_MOESM5_ESM.pdf/9547068)

*P. falciparum* parasite incidence per 1000 population

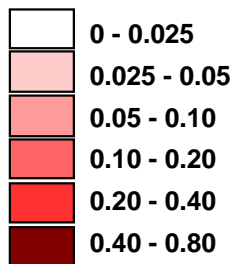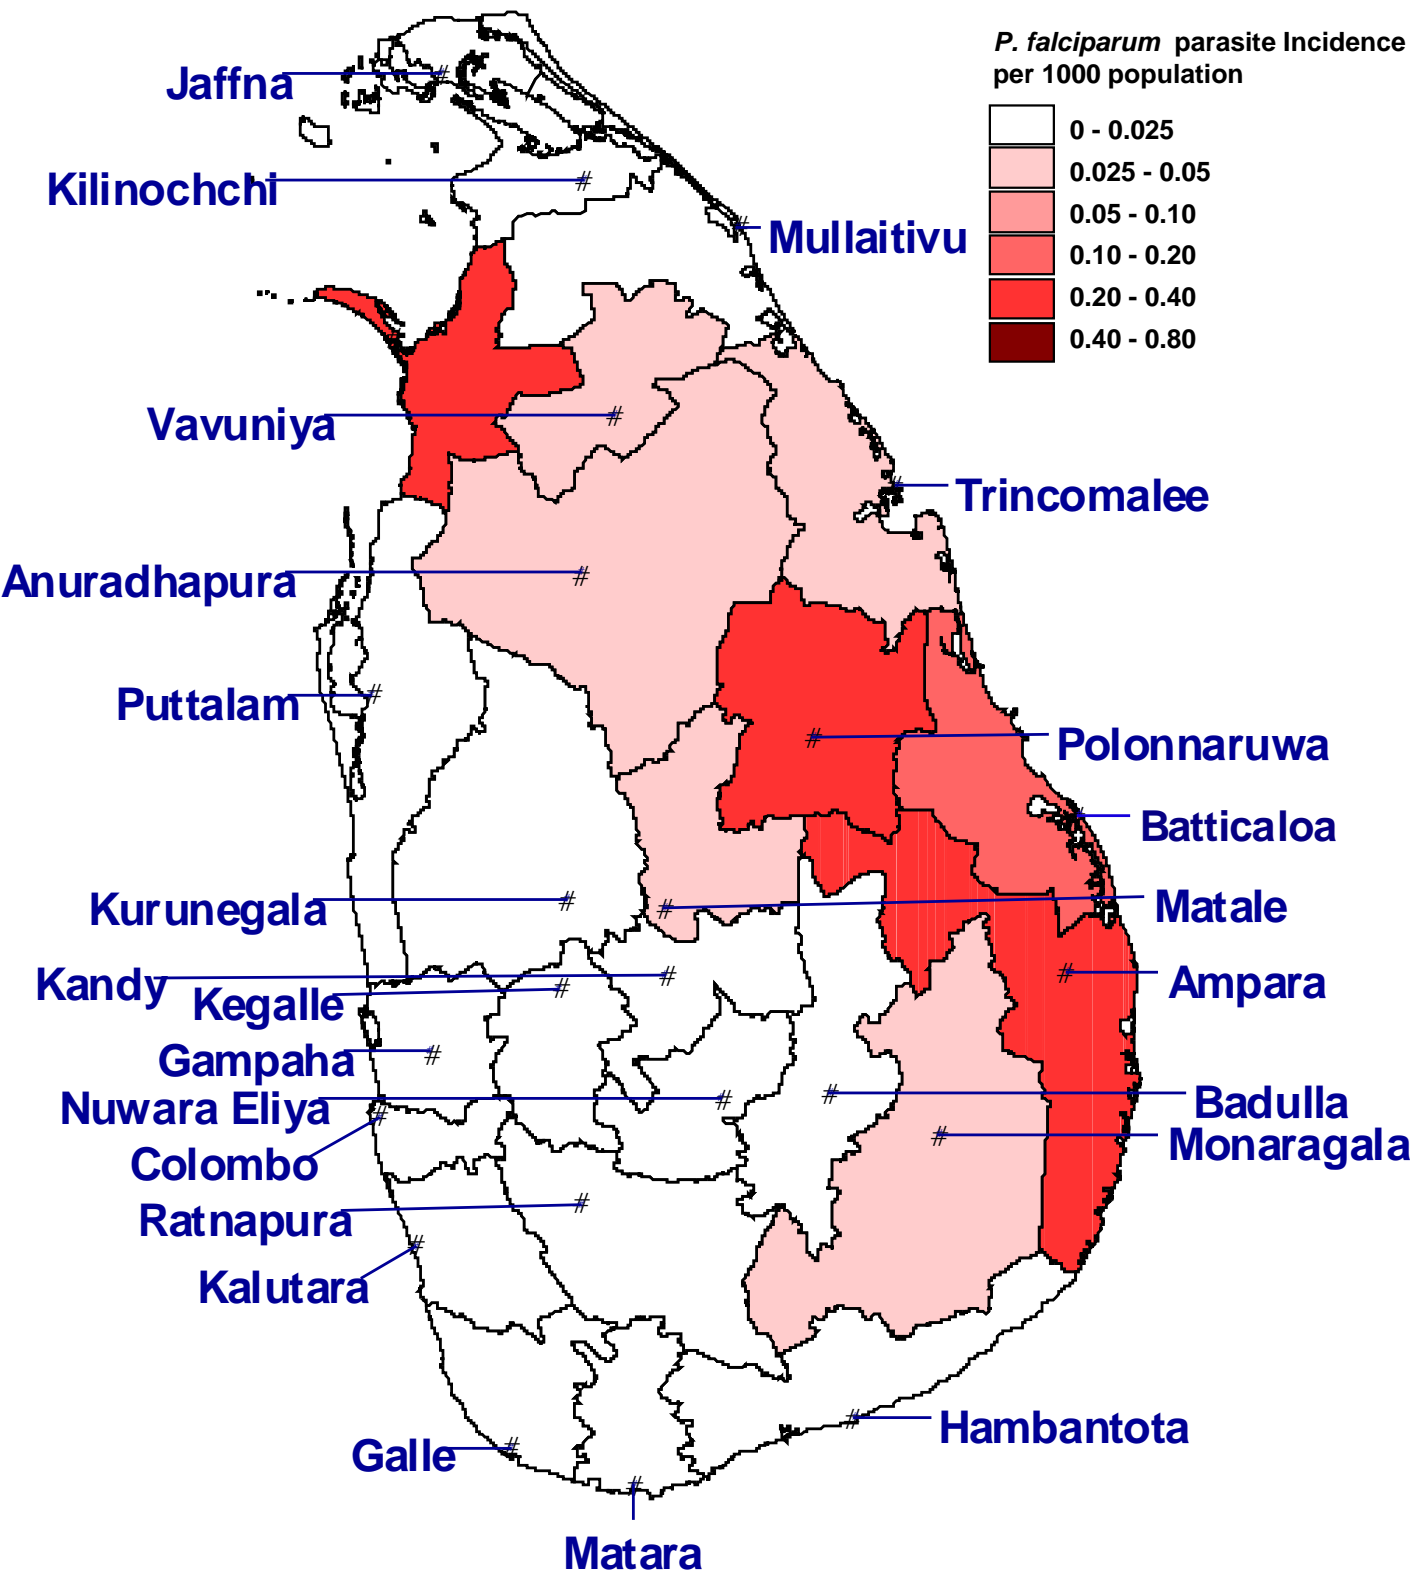

Supplement: MOESM5 [file 9547068]
